# Supplementary material for: Pyridinium/urea-based anion receptor: methine formation in the presence of basic anions
Source: Royal Society of Chemistry journal article supplement (doi:10.1039/c1ob06193c), 2011-01-01
Supplement: c1ob06193c.pdf [file c1ob06193c.pdf]

## **Supporting Information**

### **Pyridinium/urea based anion receptor: methine formation in the presence of basic anions**

**Greta Bergamaschi,<sup>a</sup> Massimo Boiocchi,<sup>b</sup> Enrico Monzani<sup>a</sup> and Valeria Amendola<sup>\*a</sup>**

a Dr. V. Amendola, Dr. G. Bergamaschi, Prof. E. Monzani

Dipartimento di Chimica Generale

Università di Pavia

via Taramelli 12, Pavia

Fax: (+)390382528544

E-mail: [valeria.amendola@unipv.it](mailto:valeria.amendola@unipv.it)

b Dr. M. Boiocchi

Centro Grandi Strumenti

Università di Pavia

## Synthesis of 1

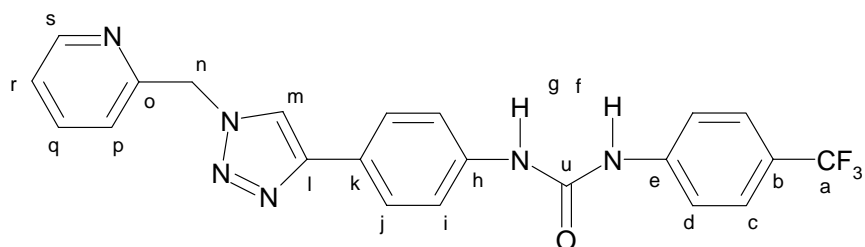

To a solution of alkyne, N-(4-(trifluoromethylphenyl)-N'-(4'-ethynylphenyl)urea, (0.35 g, 1.30 mmol) and 2-(azidomethyl)pyridine<sup>[1-2]</sup> (0.21 g, 1.52 mmol) in 20 ml methanol/t-butanol 1:1 (v:v) mixture was added a solution of Cu(OAc)<sub>2</sub>·H<sub>2</sub>O (13 mg, 0.065 mmol) in 1 ml of water. The reaction mixture was stirred at room temperature. After 18 h stirring, a white precipitate was filtered out (yield 80%, 0.45 g). ESI-MS (CH<sub>3</sub>CN): *m/z* (-) 473 [M + Cl]<sup>-</sup>; UV-vis. (CH<sub>3</sub>CN): λ<sub>max</sub> = 282 nm, ε<sub>282</sub> = 52 × 10<sup>4</sup> M<sup>-1</sup> cm<sup>-1</sup>. FT-IR (nujol mull), cm<sup>-1</sup>: 3326 (w), 3264 (w), 3111 (w), 2718 (s), 1684 (s), 1647 (m), 1601 (m), 1543 (br, m), 1342 (m), 1316 (m), 1098 (s). <sup>1</sup>H-NMR (δ, ppm, TMS; CD<sub>3</sub>CN): 8.58 (d, *J*<sub>r,s</sub> = 4.7 Hz, 1H; H-s), 8.15 (s, 1H; H-m), 7.81 (d, *J*<sub>c,d</sub> = 8.7 Hz, 2H; H-c), 7.80 (dd, *J*<sub>q,r</sub> = 7.7 Hz, *J*<sub>q,p</sub> = 7.9 Hz, 1H; H-q), 7.68 (s, 1H; H-g), 7.68 (d, *J*<sub>i,j</sub> = 9.3 Hz, 2H; H-i), 7.63 (d, *J*<sub>i,j</sub> = 9.3 Hz, 2H; H-j), 7.57 (d, *J*<sub>c,d</sub> = 8.7 Hz, 2H; H-d), 7.54 (s, 1H; H-f), 7.34 (dd, *J*<sub>r,s</sub> = 4.7 Hz, *J*<sub>r,q</sub> = 7.7 Hz, 1H; H-r), 7.32 (d, *J*<sub>p,q</sub> = 7.9 Hz, 1H; H-p), 5.70 (s, 2H; H-n). <sup>13</sup>C-NMR (δ, ppm, TMS; CD<sub>3</sub>CN): 155.4 (C-o), 155.1 (C-u), 149.7 (C-s), 147.4 (C-b), 147.3 (C-l), 143.4 (C-h), 139.4 (C-e), 137.6 (C-q), 127.7 (C-p), 126.2 (C-j), 126.2 (C-c), 124.7 (C-a), 123.5 (C-r), 123.4 (C-k), 121.0 (C-m), 119.5 (C-d), 118.7 (C-i), 55.4 (C-n).

[1] W. S. Brotherton, H. A. Michaels, J. T. Simmons, R. J. Clark, N. S. Dalal, and L. Zhu, *Org. Lett.*, **2009**, *11*, 4954-4957. D. Urankar, B. Pinter, A. Pevec, F. De Proft, I. Turel, J. Kosmrlj, *Inorg. Chem.* **2010**, *49*, 4820-4829

[2] J. Ritschel, F. Sasse and M. E. Maier, *Eur. J. Org. Chem.* **2007**, 78-87.

Compound 1:  $^1\text{H-NMR}$  in  $\text{CD}_3\text{CN}$

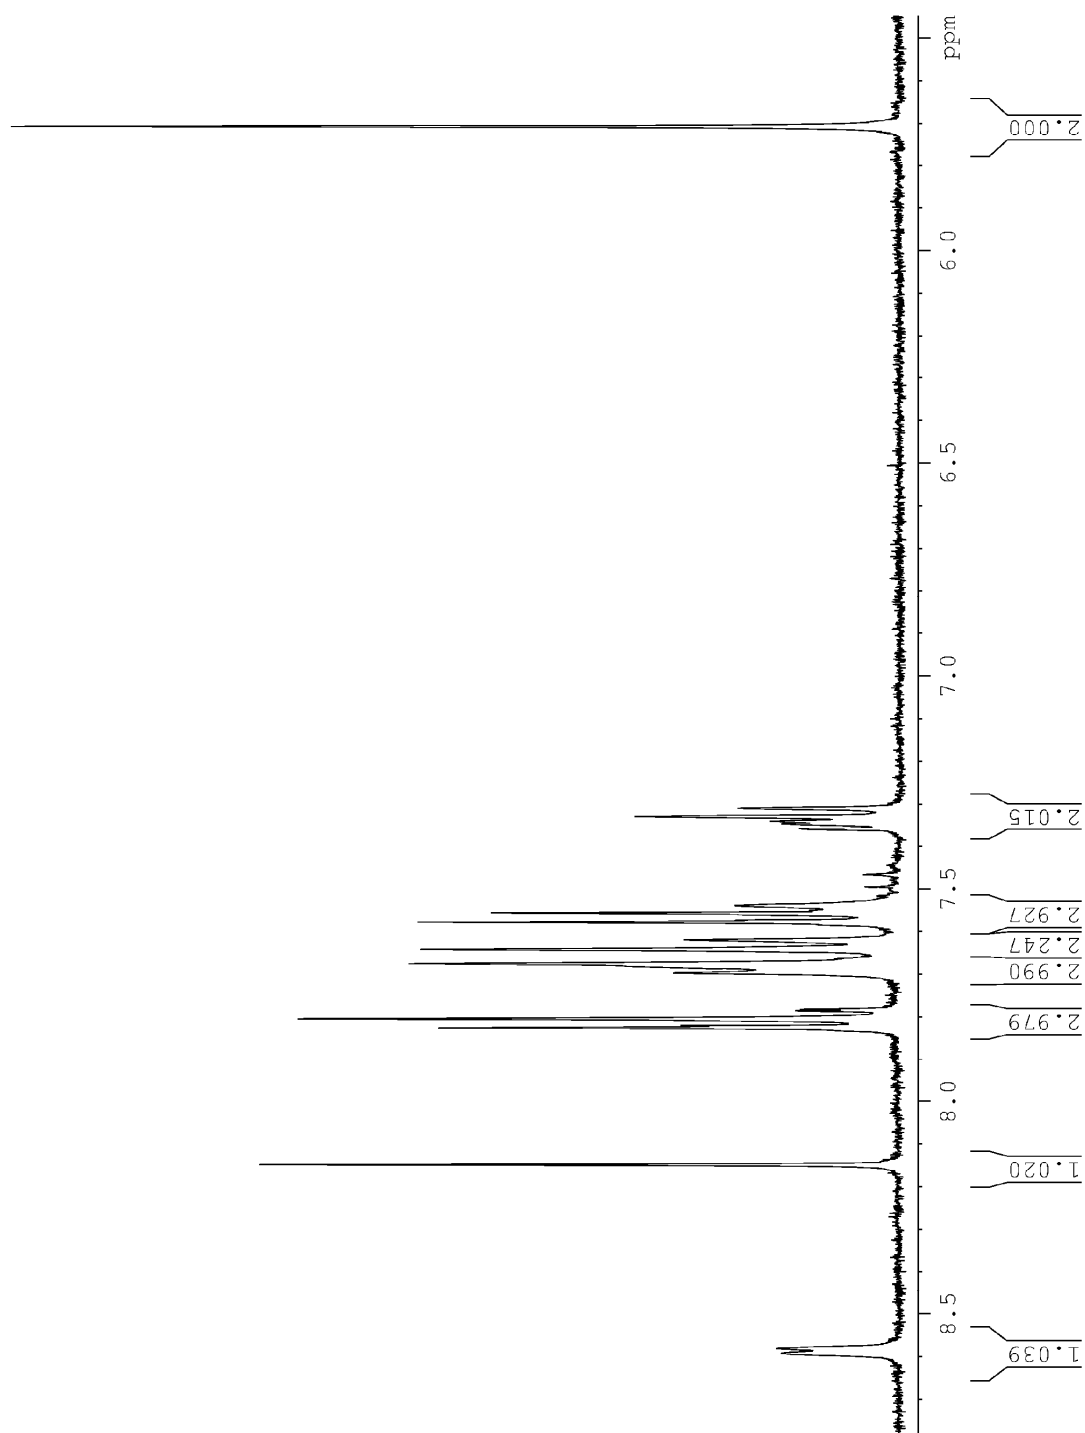

## Synthesis of 2·PF<sub>6</sub>

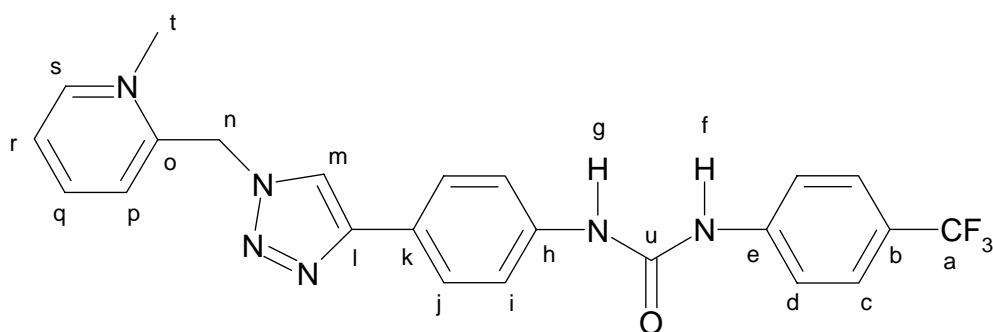

**1** (0.11 g, 0.24 mmol) was dissolved in a screw capped flask with the minimum amount of 1:1 MeCN/CHCl<sub>3</sub> mixture. Methyl iodide (3 ml, 48.17 mmol) was added to this solution and the mixture was stirred at 50°C for 24h (ESI-MS control). After this time the solvent was removed on a rotary evaporator leaving a brownish solid. The product was dissolved in a H<sub>2</sub>O/MeCN mixture and a saturated solution of NH<sub>4</sub>PF<sub>6</sub> was added dropwise; solid precipitation occurs. The white product was filtered off and dried. (yield 56%, 82mg). ESI-MS (CH<sub>3</sub>CN): *m/z* (+) 453 [M]<sup>+</sup>. UV-vis. (CH<sub>3</sub>CN): λ<sub>max</sub> = 280 nm, ε<sub>280</sub> = 50 × 10<sup>4</sup> M<sup>-1</sup> cm<sup>-1</sup>. FT-IR (nujol mull), cm<sup>-1</sup>: 3348 (w), 3149 (w), 3116 (w), 3073 (w), 2718 (s), 1684 (s), 1637 (m), 1601 (m), 1531 (m), 1327 (m), 1098 (s), 840 (br, s). <sup>1</sup>H-NMR (δ, ppm, TMS; CD<sub>3</sub>CN): 8.74 (d, *J*<sub>r,s</sub> = 6.1 Hz, 1H; H-s), 8.46 (false t, *J*<sub>obs</sub> = 8.0 Hz, 1H; H-q), 8.25 (s, 1H; H-m), 8.03 (s, 1H; H-g), 7.99 (false t, *J*<sub>obs</sub> = 6.6 Hz, 1H; H-r), 7.89 (s, 1H; H-f), 7.85 (d, *J*<sub>c,d</sub> = 8.7 Hz, 2H; H-c), 7.69 (d, *J*<sub>i,j</sub> = 8.7 Hz, 2H; H-i), 7.63 (d, *J*<sub>i,j</sub> = 8.7 Hz, 2H; H-j), 7.61 (d, *J*<sub>c,d</sub> = 8.7 Hz, 2H; H-d), 7.50 (d, *J*<sub>p,q</sub> = 8.1 Hz, 1H; H-p), 6.06 (s, 2H; H-n), 4.34 (s, 3H; H-t); <sup>13</sup>C-NMR (δ, ppm, TMS; CD<sub>3</sub>CN): 152.5 (C-u), 152.0 (C-o), 148.2 (C-b), 148.2 (C-l), 147.7 (C-s), 147.0 (C-q), 143.4 (C-h), 140.0 (C-e), 128.1 (C-p), 127.9 (C-r), 126.7 (C-j), 126.4 (C-c), 124.9 (C-a), 123.4 (C-k), 121.9 (C-m), 119.5 (C-d), 118.8 (C-i), 50.2 (C-n), 46.4 (C-t).

Compound 2·PF<sub>6</sub>: <sup>1</sup>H-NMR in CD<sub>3</sub>CN

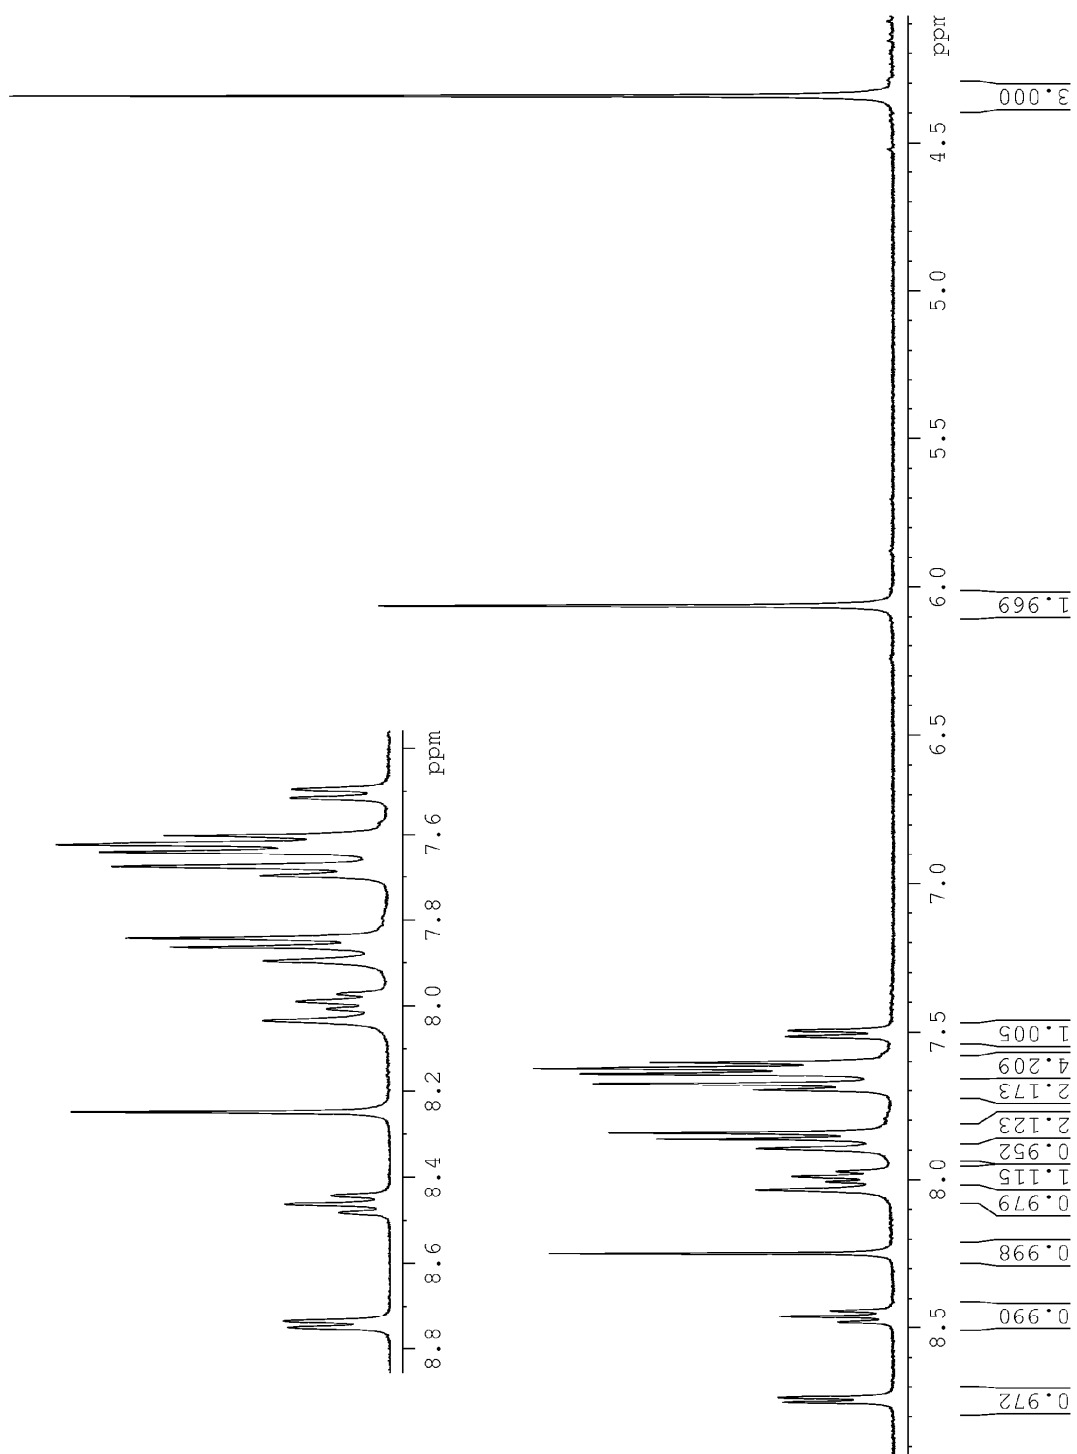

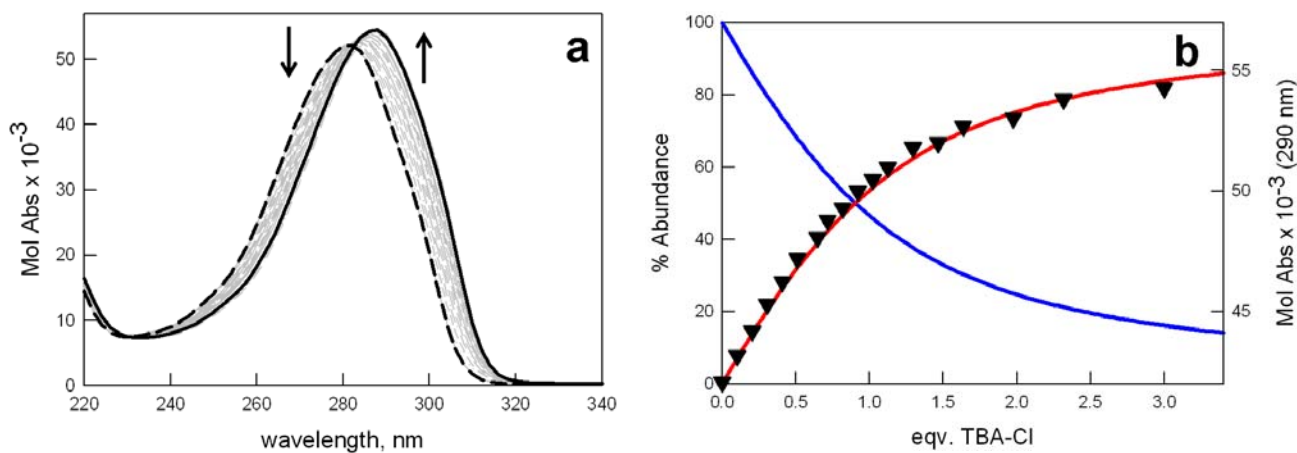

Figure S1. (a) Absorption spectra taken over the course of the titration of a solution of **1** ( $3.0 \times 10^{-4}$  M) in acetonitrile, with a  $2.0 \times 10^{-2}$  M solution of the TBA-Cl ( $l = 0.1$  cm); (b) distribution of the species present at the equilibrium. Blue line: free receptor; red line: bound receptor; black triangles: superimposed plots of Molar Absorbance (at 290 nm) vs. eqv. of TBA-Cl.  $T = 25^\circ\text{C}$ .

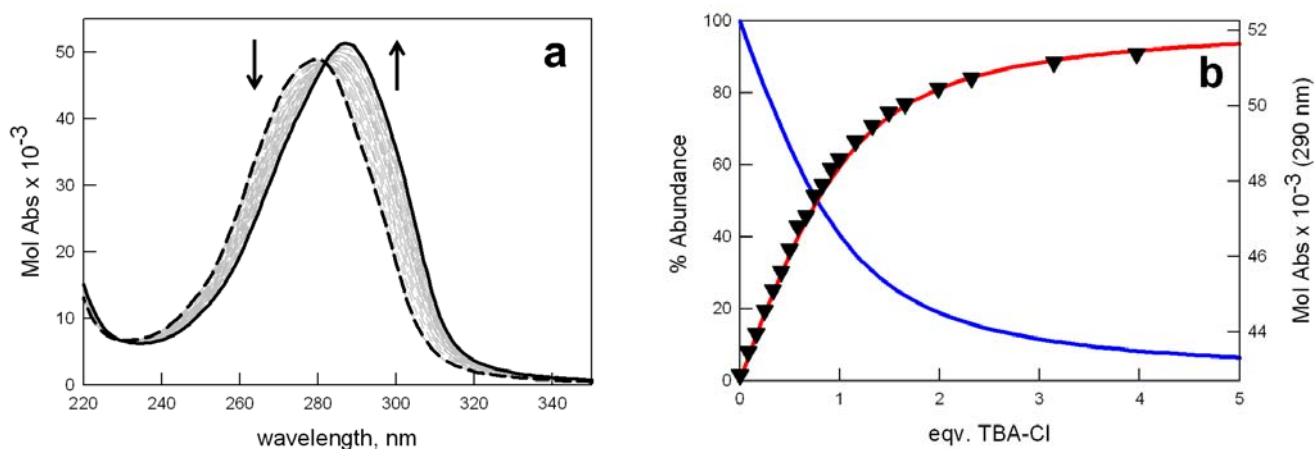

Figure S2. (a) Absorption spectra taken over the course of the titration of a solution of **2** ( $3.0 \times 10^{-4}$  M) in acetonitrile, with a  $2.0 \times 10^{-2}$  M solution of the TBA-Cl ( $l = 0.1$  cm); (b) distribution of the species present at the equilibrium. Blue line: free receptor; red line: bound receptor; black triangles: superimposed plots of Molar Absorbance (at 290 nm) vs. eqv. of TBA-Cl.  $T = 25^\circ\text{C}$ .

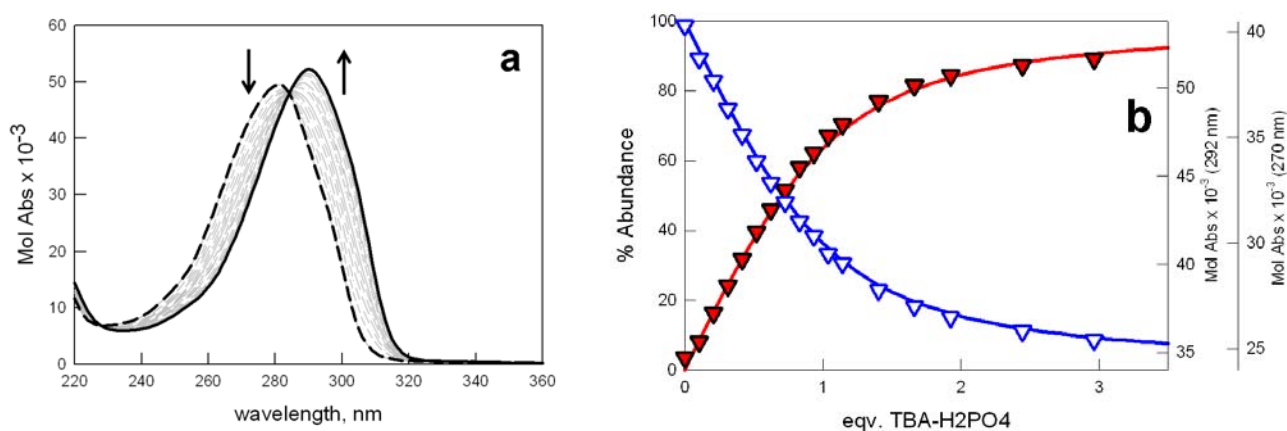

Figure S3. (a) Absorption spectra taken over the course of the titration of a solution of **1** ( $1.7 \times 10^{-4}$  M) in acetonitrile, with a  $2.7 \times 10^{-2}$  M solution of the TBA- $\text{H}_2\text{PO}_4$  ( $l = 0.1$  cm); (b) distribution of the species present at the equilibrium. Blue line: free receptor; red line: bound receptor; superimposed plots of Molar Absorbance (at 292 nm, red triangles; at 270 nm, white triangles) vs. eqv. of TBA- $\text{H}_2\text{PO}_4$ .  $T = 25^\circ\text{C}$ .

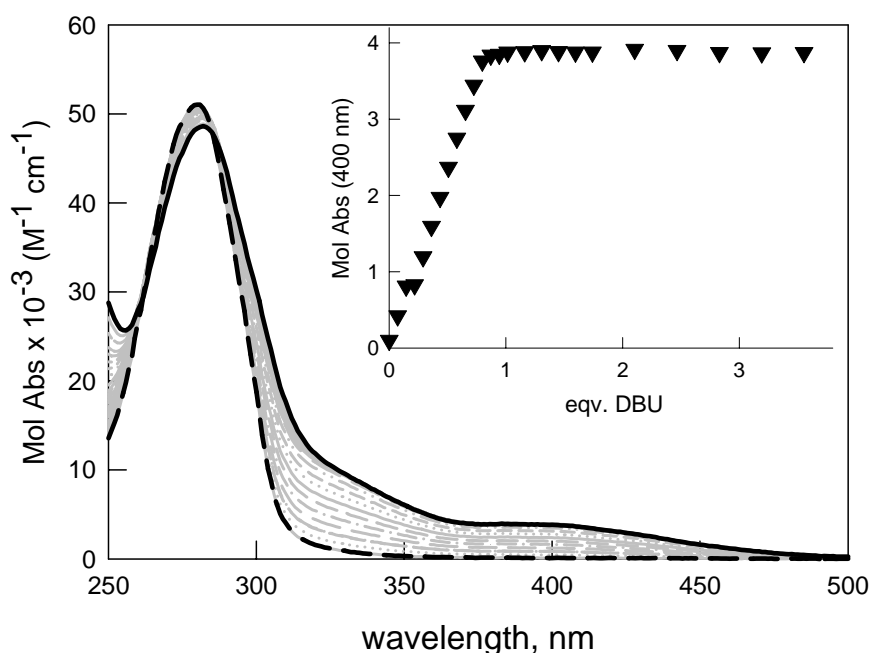

Figure S4. Absorption spectra taken over the course of the titration of a solution of **2** ( $1.7 \times 10^{-4}$  M) in acetonitrile, with a  $2.7 \times 10^{-2}$  M solution of the DBU ( $l = 0.1$  cm). Inset figure: plot of Molar Absorbance at 400 nm (black triangles) vs. eqv. of DBU.  $T = 25^\circ\text{C}$ .

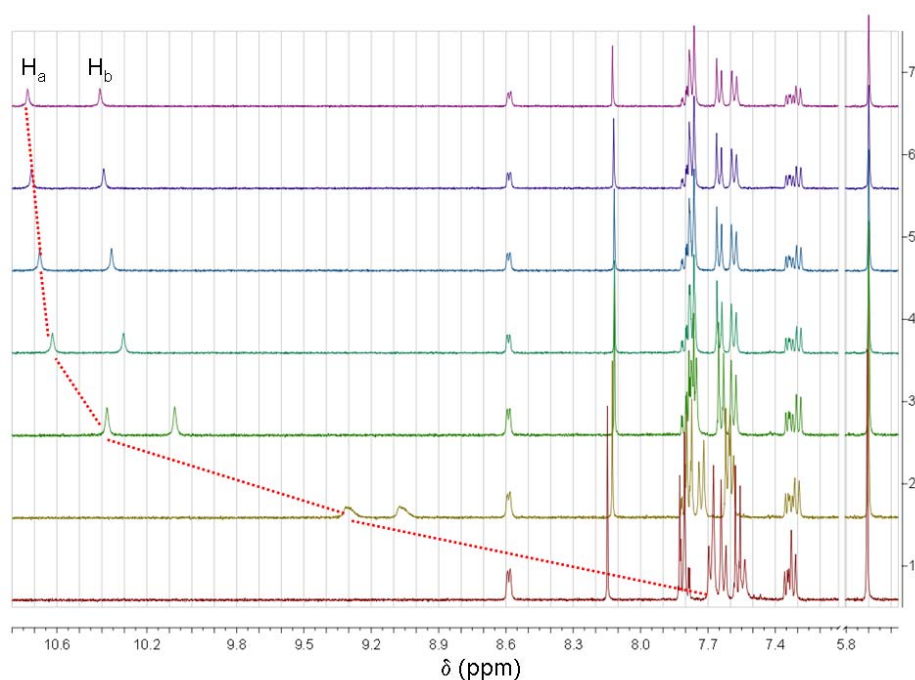

Figure S5.  $^1\text{H-NMR}$  spectra taken over the course of the titration of a  $5.2 \times 10^{-3}$  M solution of **1** in  $\text{CD}_3\text{CN}$ , with a 0.13 M solution of the TBA-Cl. Spectra 1-7 correspond to the addition of 0, 0.5, 1.0, 1.5, 2.0, 3.0, 5.0 eqv. of TBA-Cl, respectively.

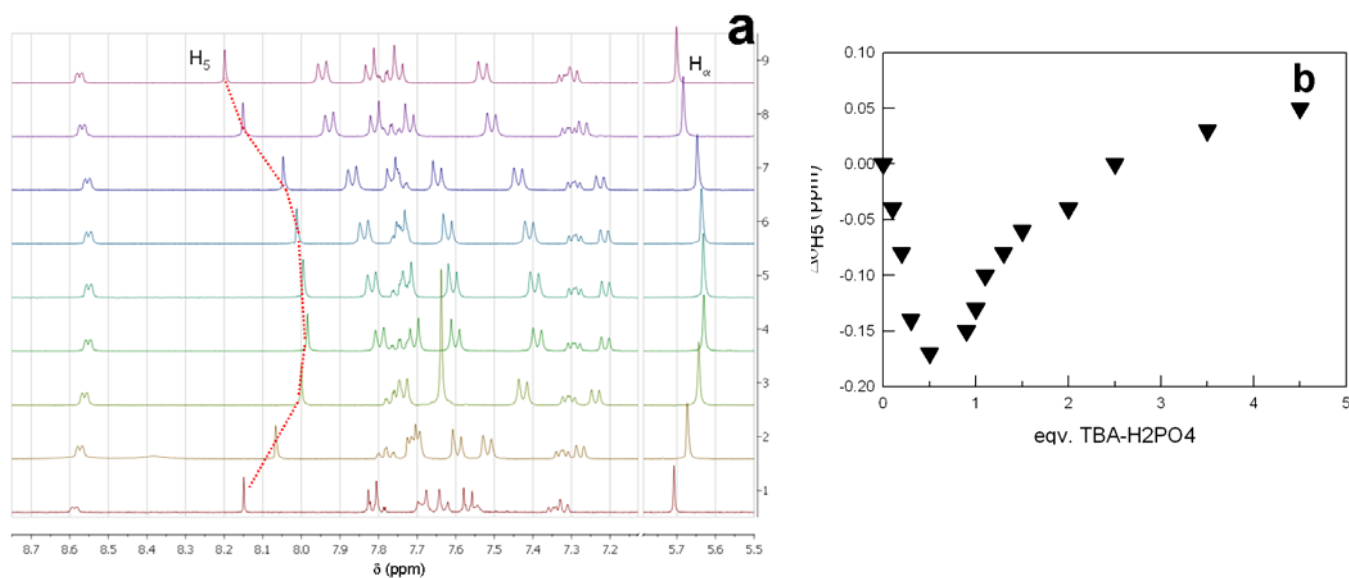

Figure S6. (a)  $^1\text{H-NMR}$  spectra taken over the course of the titration of a  $9.7 \times 10^{-3}$  M solution of **1** in  $\text{CD}_3\text{CN}$ , with a 0.069 M solution of the TBA- $\text{H}_2\text{PO}_4$ . Spectra 1-9 correspond to the addition of 0, 0.2, 0.4, 0.6, 0.8, 0.9, 1.0, 2.5 and 4.5 eqv. of TBA- $\text{H}_2\text{PO}_4$ , respectively. (b) Plot of  $\Delta\delta\text{H}_5$  vs. eqv. of the added TBA- $\text{H}_2\text{PO}_4$ .



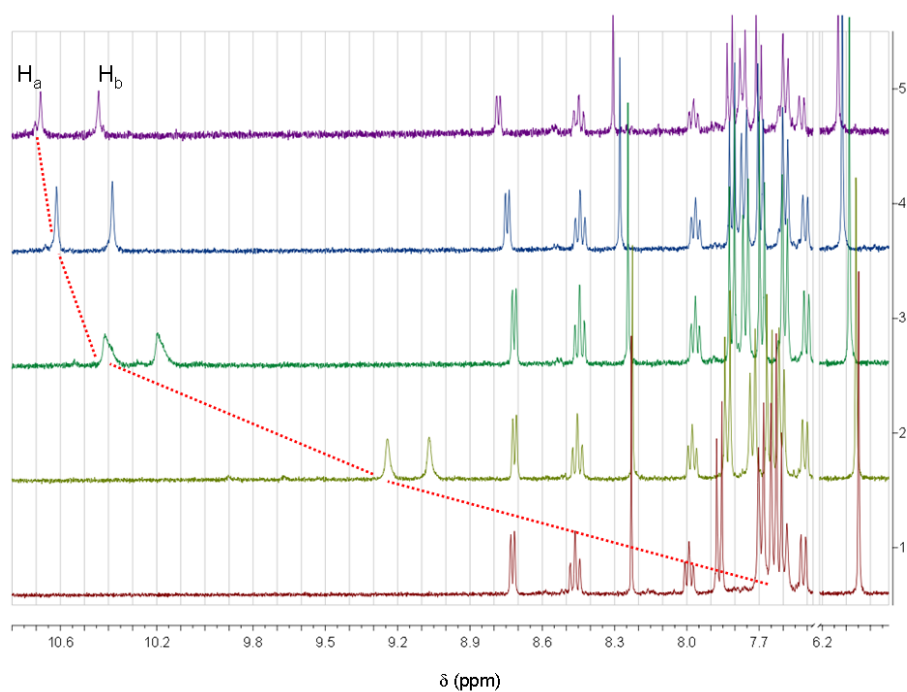

Figure S7. <sup>1</sup>H-NMR spectra taken over the course of the titration of a  $3.5 \times 10^{-3}$  M solution of **2** in CD<sub>3</sub>CN, with a 0.13 M solution of the TBA-Cl. Spectra 1-5 correspond to the addition of 0, 0.5, 1.0, 1.5 and 2.0 eqv. of TBA-Cl, respectively.

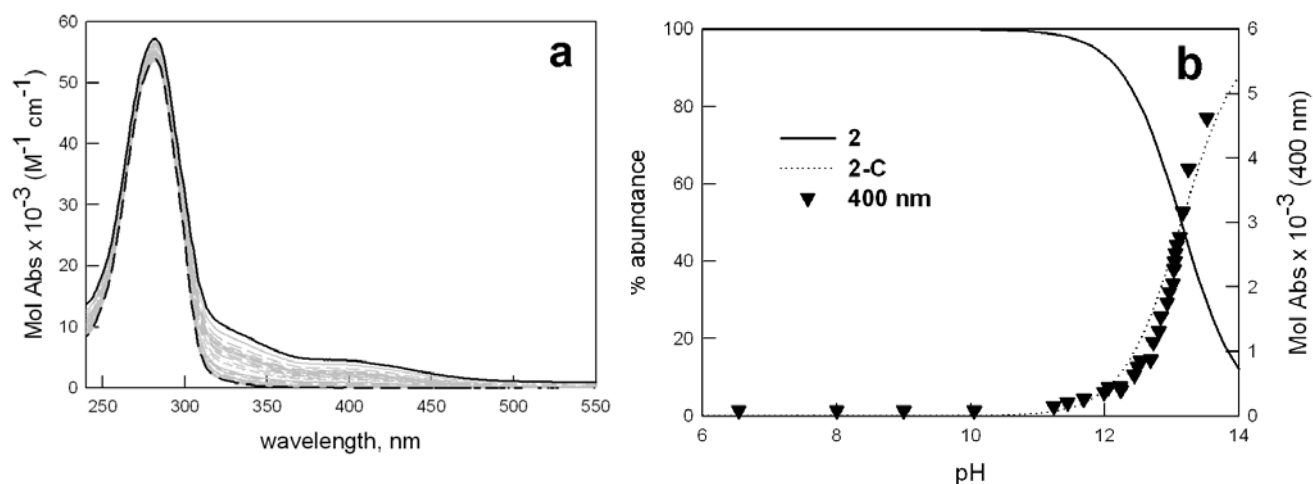

Figure S8. (a) Family of UV-vis. spectra taken over the course of the pH-spectrophotometric titration of **2** in CH<sub>3</sub>CN/water mixture (9/1 v/v). (b) Distribution diagram with the superimposed pH-spectrophotometric profile (at 400 nm).

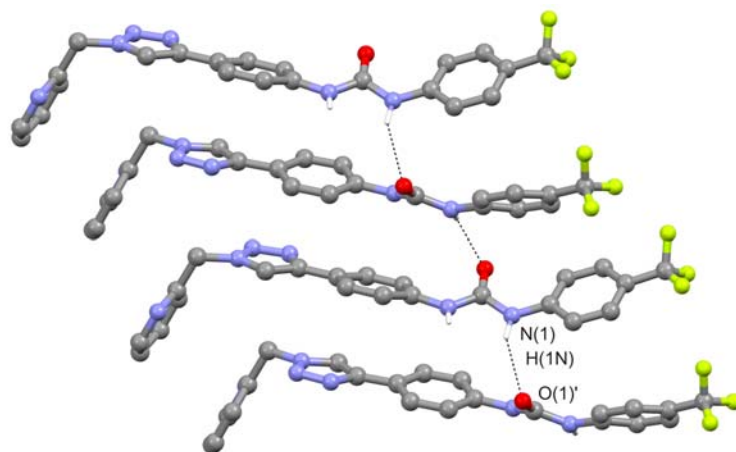

Figure S9. A simplified sketch of overlapping receptors **1** forming rows parallel to the *a* crystallographic axis. These rows are maintained by weak N-H...O urea-urea interactions (atom names identify the independent N-H...O interaction). Features of the N-H...O interactions are: N(1)...O(1)' 3.18(1) Å, H(1N)...O(1)' 2.37(3) Å, N(1)-H(1N)...O(1)' 142.3(23)°; symmetry code: (') =  $x-1/2, 1/2-y, z$ .
